# Supplementary material
Source: PubMed Central journal article supplement (PMC5628091)
Supplement: NIHMS868178-supplement-Supplemental_Data_File___doc___tif__pdf__etc__.pdf [file NIHMS868178-supplement-Supplemental_Data_File___doc___tif__pdf__etc__.pdf]

## Supplemental Digital Content 1: Screenshots showing Decision Support-Symptom Management System

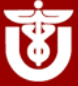

The University of Utah  
College of Nursing

Log Off Patient Alerts All Patients Patient Activity

Study Site: Utah ▼

### Patient Alerts

| Patient (# of Alerts)            | Alerting Symptom  | Severity | Distress | Date Alerted | Alert Status |
|----------------------------------|-------------------|----------|----------|--------------|--------------|
| <a href="#">Gordon, Evan (1)</a> | general           |          |          | 11/14/2016   | New          |
| <a href="#">Jackson, Ian (5)</a> | general           |          |          | 11/14/2016   | New          |
|                                  | diarrhea          | 6        | 8        | 11/14/2016   | New          |
|                                  | sore mouth        | 8        | 7        | 11/14/2016   | New          |
|                                  | diarrhea          | 6        | 8        | 11/14/2016   | New          |
|                                  | sore mouth        | 8        | 7        | 11/14/2016   | New          |
| <a href="#">Jones, Susan (1)</a> | nausea/vomiting   | 9        | 9        | 10/13/2016   | New          |
| <a href="#">Hills, Frank (1)</a> | numbness/tingling | 8        | 8        | 11/14/2016   | New          |
| <a href="#">Carter, Bob (1)</a>  | pain              | 7        | 7        | 11/16/2016   | Follow Up    |

SCREENSHOT A: Default screen that opens when the NP logs into the SymptomCare@Home DS-SMS. It lists patient alert status for the day or requirement for follow up from a previous day. If the NP goes into the Patient Activity Screen on the upper middle gold bar area, she/he can view who is still in the queue to call in for the day.

|                                                                                                                                                                                                                                                                                                                                                                                                                                                                                                                                                                                                                                                                                                                                                                                                                                                                                                                                                                                                                                                                                                                                                                                                                                                                                                                                                                                                                                                                                                                                                                                                                                                                                                                                                                                                                     |                       |                                                                                                                                                   |                                                                   |                                                       |
|---------------------------------------------------------------------------------------------------------------------------------------------------------------------------------------------------------------------------------------------------------------------------------------------------------------------------------------------------------------------------------------------------------------------------------------------------------------------------------------------------------------------------------------------------------------------------------------------------------------------------------------------------------------------------------------------------------------------------------------------------------------------------------------------------------------------------------------------------------------------------------------------------------------------------------------------------------------------------------------------------------------------------------------------------------------------------------------------------------------------------------------------------------------------------------------------------------------------------------------------------------------------------------------------------------------------------------------------------------------------------------------------------------------------------------------------------------------------------------------------------------------------------------------------------------------------------------------------------------------------------------------------------------------------------------------------------------------------------------------------------------------------------------------------------------------------|-----------------------|---------------------------------------------------------------------------------------------------------------------------------------------------|-------------------------------------------------------------------|-------------------------------------------------------|
| <b>Patient Alerts</b><br><a href="#">All Patients</a>                                                                                                                                                                                                                                                                                                                                                                                                                                                                                                                                                                                                                                                                                                                                                                                                                                                                                                                                                                                                                                                                                                                                                                                                                                                                                                                                                                                                                                                                                                                                                                                                                                                                                                                                                               |                       | <b>Bobbi Tester-Experimental</b> MRN: 1<br>DOB: 2/15/1963    Phone: 8015875830    Physician: John Ward<br>Pharmacy: Walgreen's    Pharmacy Phone: |                                                                   | Antiemesis <span style="float: right;">Log Off</span> |
| <a href="#">Show Guideline</a>                                                                                                                                                                                                                                                                                                                                                                                                                                                                                                                                                                                                                                                                                                                                                                                                                                                                                                                                                                                                                                                                                                                                                                                                                                                                                                                                                                                                                                                                                                                                                                                                                                                                                                                                                                                      |                       |                                                                                                                                                   |                                                                   |                                                       |
| <b>Alerts</b>                                                                                                                                                                                                                                                                                                                                                                                                                                                                                                                                                                                                                                                                                                                                                                                                                                                                                                                                                                                                                                                                                                                                                                                                                                                                                                                                                                                                                                                                                                                                                                                                                                                                                                                                                                                                       | <b>Symptom Graphs</b> | <b>Assessment</b>                                                                                                                                 | <b>Intervention</b>                                               | <b>Reports</b>                                        |
| <a href="#">nausea/vomiting</a> <a href="#">sore mouth</a> <a href="#">diarrhea</a> <a href="#">fever</a> <a href="#">fatigue</a> <a href="#">trouble thinking</a> <a href="#">down or blue</a> <a href="#">nervous/anxious</a> <a href="#">appearance</a> <a href="#">pain</a> <a href="#">numbness/tingling</a> <a href="#">trouble sleeping</a> <a href="#">Review EMR</a>                                                                                                                                                                                                                                                                                                                                                                                                                                                                                                                                                                                                                                                                                                                                                                                                                                                                                                                                                                                                                                                                                                                                                                                                                                                                                                                                                                                                                                       |                       |                                                                                                                                                   |                                                                   |                                                       |
| How Caller Feels: <b>Patient has experienced symptoms.</b>                                                                                                                                                                                                                                                                                                                                                                                                                                                                                                                                                                                                                                                                                                                                                                                                                                                                                                                                                                                                                                                                                                                                                                                                                                                                                                                                                                                                                                                                                                                                                                                                                                                                                                                                                          |                       |                                                                                                                                                   | TLC Data Date: 10/24/2012 <span style="float: right;">View</span> |                                                       |
| <b>Overall Functioning (SHDQ)</b> <span style="float: right;">✕</span>                                                                                                                                                                                                                                                                                                                                                                                                                                                                                                                                                                                                                                                                                                                                                                                                                                                                                                                                                                                                                                                                                                                                                                                                                                                                                                                                                                                                                                                                                                                                                                                                                                                                                                                                              |                       |                                                                                                                                                   |                                                                   |                                                       |
| <b>Nausea/Vomiting</b>                                                                                                                                                                                                                                                                                                                                                                                                                                                                                                                                                                                                                                                                                                                                                                                                                                                                                                                                                                                                                                                                                                                                                                                                                                                                                                                                                                                                                                                                                                                                                                                                                                                                                                                                                                                              |                       | <b>Severity Score: 5</b>                                                                                                                          | <b>Distress Score: 4</b>                                          | ✕                                                     |
| # times vomited in last 24 hours <b>2</b><br># cups of fluid consumed <b>6</b><br>Felt dizzy or lightheaded <b>no</b><br>Nausea occurred <b>comes and goes</b><br>Taken prescription medication                                                                                                                                                                                                                                                                                                                                                                                                                                                                                                                                                                                                                                                                                                                                                                                                                                                                                                                                                                                                                                                                                                                                                                                                                                                                                                                                                                                                                                                                                                                                                                                                                     |                       |                                                                                                                                                   |                                                                   |                                                       |
| <b>Sore Mouth</b>                                                                                                                                                                                                                                                                                                                                                                                                                                                                                                                                                                                                                                                                                                                                                                                                                                                                                                                                                                                                                                                                                                                                                                                                                                                                                                                                                                                                                                                                                                                                                                                                                                                                                                                                                                                                   |                       | <b>Severity Score: 0</b>                                                                                                                          | <b>Distress Score: 0</b>                                          | ✕                                                     |
| <b>Diarrhea</b>                                                                                                                                                                                                                                                                                                                                                                                                                                                                                                                                                                                                                                                                                                                                                                                                                                                                                                                                                                                                                                                                                                                                                                                                                                                                                                                                                                                                                                                                                                                                                                                                                                                                                                                                                                                                     |                       | <b>Severity Score: 0</b>                                                                                                                          | <b>Distress Score: 0</b>                                          | ✕                                                     |
| <b>Fever and Chills</b>                                                                                                                                                                                                                                                                                                                                                                                                                                                                                                                                                                                                                                                                                                                                                                                                                                                                                                                                                                                                                                                                                                                                                                                                                                                                                                                                                                                                                                                                                                                                                                                                                                                                                                                                                                                             |                       | <b>Temperature: 0</b>                                                                                                                             | <b>Distress Score: 0</b>                                          | ✕                                                     |
| <b>Fatigue</b>                                                                                                                                                                                                                                                                                                                                                                                                                                                                                                                                                                                                                                                                                                                                                                                                                                                                                                                                                                                                                                                                                                                                                                                                                                                                                                                                                                                                                                                                                                                                                                                                                                                                                                                                                                                                      |                       | <b>Severity Score: 0</b>                                                                                                                          | <b>Distress Score: 0</b>                                          | ✕                                                     |
| <b>Trouble Thinking/Concentrating</b>                                                                                                                                                                                                                                                                                                                                                                                                                                                                                                                                                                                                                                                                                                                                                                                                                                                                                                                                                                                                                                                                                                                                                                                                                                                                                                                                                                                                                                                                                                                                                                                                                                                                                                                                                                               |                       | <b>Severity Score: 0</b>                                                                                                                          | <b>Distress Score: 0</b>                                          | ✕                                                     |
| <b>Feeling Down and Blue</b>                                                                                                                                                                                                                                                                                                                                                                                                                                                                                                                                                                                                                                                                                                                                                                                                                                                                                                                                                                                                                                                                                                                                                                                                                                                                                                                                                                                                                                                                                                                                                                                                                                                                                                                                                                                        |                       | <b>Severity Score: 0</b>                                                                                                                          | <b>Distress Score: 0</b>                                          | ✕                                                     |
| <b>Feeling Nervous and Anxious</b>                                                                                                                                                                                                                                                                                                                                                                                                                                                                                                                                                                                                                                                                                                                                                                                                                                                                                                                                                                                                                                                                                                                                                                                                                                                                                                                                                                                                                                                                                                                                                                                                                                                                                                                                                                                  |                       | <b>Severity Score: 0</b>                                                                                                                          | <b>Distress Score: 0</b>                                          | ✕                                                     |
| <b>Changes in Appearance</b>                                                                                                                                                                                                                                                                                                                                                                                                                                                                                                                                                                                                                                                                                                                                                                                                                                                                                                                                                                                                                                                                                                                                                                                                                                                                                                                                                                                                                                                                                                                                                                                                                                                                                                                                                                                        |                       | <b>Severity Score: 0</b>                                                                                                                          | <b>Distress Score: 0</b>                                          | ✕                                                     |
| <b>Pain</b>                                                                                                                                                                                                                                                                                                                                                                                                                                                                                                                                                                                                                                                                                                                                                                                                                                                                                                                                                                                                                                                                                                                                                                                                                                                                                                                                                                                                                                                                                                                                                                                                                                                                                                                                                                                                         |                       | <b>Severity Score: 0</b>                                                                                                                          | <b>Distress Score: 0</b>                                          | ✕                                                     |
| <b>Numbness and Tingling</b>                                                                                                                                                                                                                                                                                                                                                                                                                                                                                                                                                                                                                                                                                                                                                                                                                                                                                                                                                                                                                                                                                                                                                                                                                                                                                                                                                                                                                                                                                                                                                                                                                                                                                                                                                                                        |                       | <b>Severity Score: 0</b>                                                                                                                          | <b>Distress Score: 0</b>                                          | ✕                                                     |
| <b>Trouble Sleeping</b>                                                                                                                                                                                                                                                                                                                                                                                                                                                                                                                                                                                                                                                                                                                                                                                                                                                                                                                                                                                                                                                                                                                                                                                                                                                                                                                                                                                                                                                                                                                                                                                                                                                                                                                                                                                             |                       | <b>Severity Score: 0</b>                                                                                                                          | <b>Distress Score: 0</b>                                          | ✕                                                     |
| <b>Review Medical Record</b> <span style="float: right;">✕</span>                                                                                                                                                                                                                                                                                                                                                                                                                                                                                                                                                                                                                                                                                                                                                                                                                                                                                                                                                                                                                                                                                                                                                                                                                                                                                                                                                                                                                                                                                                                                                                                                                                                                                                                                                   |                       |                                                                                                                                                   |                                                                   |                                                       |
| <div style="border: 1px solid #ccc; padding: 5px;"> <input type="checkbox"/> <b>Documents/Clinical Forms</b> <ul style="list-style-type: none"> <li>History of other illnesses/comorbidities (cardiac, pulmonary, renal, hepatic, neurologic and endocrine dysfunction; restless leg syndrome, narcolepsy, obstructive sleep apnea)</li> <li>Disease status and treatment</li> <li>Venus access device</li> <li>Type of chemotherapy</li> <li>Diet including enteral and parenteral nutrition</li> <li>Other medical conditions include irritable bowel syndrome, infection (viral, bacterial, protozoan, parasitic, fungal), surgery, fecal impaction</li> <li>Use of alternative therapies (e.g., dietary supplements, herbal remedies, coffee enemas)</li> <li>Social/Behavioral, Counseling</li> </ul> </div> <div style="border: 1px solid #ccc; padding: 5px; margin-top: 5px;"> <input type="checkbox"/> <b>Patient Information</b> <ul style="list-style-type: none"> <li>Drug Allergies</li> <li>Food Allergies (including lactose intolerance, and others)</li> <li>Other Allergies (including latex, environmental, etc.)</li> </ul> </div> <div style="border: 1px solid #ccc; padding: 5px; margin-top: 5px;"> <input type="checkbox"/> <b>Labs</b> <ul style="list-style-type: none"> <li>Anemia</li> <li>Neutropenia</li> <li>Fluid and electrolyte imbalances (sodium, potassium, calcium, magnesium)</li> </ul> </div> <div style="border: 1px solid #ccc; padding: 5px; margin-top: 5px;"> <input type="checkbox"/> <b>Medications</b> <ul style="list-style-type: none"> <li>Current medications/medication changes</li> <li>Corticosteroids</li> <li>Antibiotics, laxatives, antacids, NSAIDS</li> </ul> </div> <div style="margin-top: 10px;"> <input type="button" value="Save Data"/> </div> |                       |                                                                                                                                                   |                                                                   |                                                       |

SCREENSHOT B: This screen provides details of the symptoms reported by the patient in the IVR. Nausea/vomiting has been selected as the symptom generating an alert, keeping in mind there are often multiple symptom alerts for one patient. The screen summarizes additional information that the patient reported, such as number of times vomited in the last 24 hours. The boxes at the bottom left of the screen are checked after the NP reviews pertinent information from the patient's EHR.

|                                                                                                                                                                                                                                                                                                                                                                                                                                                                                                  |                       |                                                                                                                                                   |                                                                                                                                                                                                     |                                              |                         |
|--------------------------------------------------------------------------------------------------------------------------------------------------------------------------------------------------------------------------------------------------------------------------------------------------------------------------------------------------------------------------------------------------------------------------------------------------------------------------------------------------|-----------------------|---------------------------------------------------------------------------------------------------------------------------------------------------|-----------------------------------------------------------------------------------------------------------------------------------------------------------------------------------------------------|----------------------------------------------|-------------------------|
| <b>Patient Alerts</b><br><b>All Patients</b>                                                                                                                                                                                                                                                                                                                                                                                                                                                     |                       | <b>Bobbi Tester-Experimental</b> MRN: 1<br>DOB: 2/15/1963    Phone: 8015875830    Physician: John Ward<br>Pharmacy: Walgreen's    Pharmacy Phone: |                                                                                                                                                                                                     | Antiemesis<br><a href="#">Show Guideline</a> | <a href="#">Log Off</a> |
| <b>Alerts</b>                                                                                                                                                                                                                                                                                                                                                                                                                                                                                    | <b>Symptom Graphs</b> | <b>Assessment</b>                                                                                                                                 | <b>Intervention</b>                                                                                                                                                                                 | <b>Reports</b>                               |                         |
| <a href="#">nausea/vomiting</a> <a href="#">sore mouth</a> <a href="#">diarrhea</a> <a href="#">fever</a> <a href="#">fatigue</a> <a href="#">trouble thinking</a> <a href="#">down or blue</a> <a href="#">nervous/anxious</a> <a href="#">appearance</a> <a href="#">pain</a> <a href="#">numbness/tingling</a> <a href="#">trouble sleeping</a> <a href="#">Open Alerts</a>                                                                                                                   |                       |                                                                                                                                                   |                                                                                                                                                                                                     |                                              |                         |
| How Caller Feels: <b>Patient has experienced symptoms.</b> Last Completed Date: <b>10/24/2012</b>                                                                                                                                                                                                                                                                                                                                                                                                |                       |                                                                                                                                                   |                                                                                                                                                                                                     |                                              |                         |
| Notes Prior To Contacting Patient<br><div style="border: 1px solid black; padding: 5px; min-height: 50px;">           49yo female with breast ca. Rec'd cycle 3 DD AC on 10/22/12. Alerts today for nausea and some <u>emesis</u>. Pt has <u>compazine</u>, <u>zofran</u>, and <u>lorazepam</u> written for <u>antiemetics</u> per <u>EMR</u>.         </div> <div style="margin-top: 5px;"> <input type="button" value="Set Start Phone Call Time Stamp"/> 10/24/2012 5:11:36 PM         </div> |                       |                                                                                                                                                   |                                                                                                                                                                                                     |                                              |                         |
| <b>Nausea/Vomiting</b>                                                                                                                                                                                                                                                                                                                                                                                                                                                                           |                       |                                                                                                                                                   |                                                                                                                                                                                                     |                                              |                         |
| Experienced Symptom: <input type="button" value="Yes"/> Severity Score: <input type="button" value="5"/> Distress Score: <input type="button" value="4"/>                                                                                                                                                                                                                                                                                                                                        |                       |                                                                                                                                                   |                                                                                                                                                                                                     |                                              |                         |
| <b>CALL THE PATIENT AND INQUIRE ABOUT:</b>                                                                                                                                                                                                                                                                                                                                                                                                                                                       |                       |                                                                                                                                                   | Action    What to do detail                                                                                                                                                                         |                                              |                         |
| <input checked="" type="checkbox"/> Confirm date of last chemo and what given                                                                                                                                                                                                                                                                                                                                                                                                                    |                       |                                                                                                                                                   | <b>NONPHARMACOLOGIC</b>                                                                                                                                                                             |                                              |                         |
| <input checked="" type="checkbox"/> Assess nausea: onset, frequency, intensity, alleviating/aggravating factors <ul style="list-style-type: none"> <li>▪ If chemotherapy-related, then non-urgent</li> <li>▪ If acute, delayed or anticipatory, then non-urgent</li> </ul>                                                                                                                                                                                                                       |                       |                                                                                                                                                   | <input checked="" type="checkbox"/> <u>Water</u>                                                                                                                                                    |                                              |                         |
| <input checked="" type="checkbox"/> Assess vomiting: character, color, force, quantity, frequency                                                                                                                                                                                                                                                                                                                                                                                                |                       |                                                                                                                                                   | <input checked="" type="checkbox"/> <u>Food</u>                                                                                                                                                     |                                              |                         |
| <input checked="" type="checkbox"/> <u>Headache</u>                                                                                                                                                                                                                                                                                                                                                                                                                                              |                       |                                                                                                                                                   | <input checked="" type="checkbox"/> <u>Signs of dehydration</u>                                                                                                                                     |                                              |                         |
| <input checked="" type="checkbox"/> Food/fluid intake over the last 24 hours? <ul style="list-style-type: none"> <li>▪ If unable to eat or drink for 24 hours, then urgent</li> </ul>                                                                                                                                                                                                                                                                                                            |                       |                                                                                                                                                   | <input checked="" type="checkbox"/> <u>Contacting Doctor</u>                                                                                                                                        |                                              |                         |
| <input checked="" type="checkbox"/> Signs of dehydration: decreased urine output, fever, thirst, dry mucus membranes, weakness, dizziness, confusion                                                                                                                                                                                                                                                                                                                                             |                       |                                                                                                                                                   | <input checked="" type="checkbox"/> <u>Distraction strategies</u> <ul style="list-style-type: none"> <li>▪ music, moderate exercise, relaxation, breathing exercises, t.v, crafts</li> </ul>        |                                              |                         |
| <input checked="" type="checkbox"/> Any abdominal distention                                                                                                                                                                                                                                                                                                                                                                                                                                     |                       |                                                                                                                                                   | <input checked="" type="checkbox"/> <u>Psychoeducational support and information</u> <ul style="list-style-type: none"> <li>▪ loose clothing/ventilation</li> <li>▪ peaceful environment</li> </ul> |                                              |                         |
| <input type="checkbox"/> Presence of flatus, time of last BM                                                                                                                                                                                                                                                                                                                                                                                                                                     |                       |                                                                                                                                                   | <b>REFERRAL</b>                                                                                                                                                                                     |                                              |                         |
| <input checked="" type="checkbox"/> Use of OTC, supplements and other, including complimentary treatments and non-pharmacologic interventions                                                                                                                                                                                                                                                                                                                                                    |                       |                                                                                                                                                   | <input type="checkbox"/> <u>Emergency Room</u>                                                                                                                                                      |                                              |                         |
| <input checked="" type="checkbox"/> Have they listened to hints in TLC script? Did they use any of these? Did any of these help                                                                                                                                                                                                                                                                                                                                                                  |                       |                                                                                                                                                   | <input type="checkbox"/> <u>Doctor appointment in next 24 hours</u>                                                                                                                                 |                                              |                         |
|                                                                                                                                                                                                                                                                                                                                                                                                                                                                                                  |                       |                                                                                                                                                   | <input type="checkbox"/> <u>Doctor appointment after 24 hours</u>                                                                                                                                   |                                              |                         |
|                                                                                                                                                                                                                                                                                                                                                                                                                                                                                                  |                       |                                                                                                                                                   | <input type="checkbox"/> <u>Acupuncture</u>                                                                                                                                                         |                                              |                         |
|                                                                                                                                                                                                                                                                                                                                                                                                                                                                                                  |                       |                                                                                                                                                   | <input type="checkbox"/> <u>Guided imagery</u>                                                                                                                                                      |                                              |                         |
|                                                                                                                                                                                                                                                                                                                                                                                                                                                                                                  |                       |                                                                                                                                                   | <input type="checkbox"/> <u>Music therapy</u>                                                                                                                                                       |                                              |                         |
|                                                                                                                                                                                                                                                                                                                                                                                                                                                                                                  |                       |                                                                                                                                                   | <input type="checkbox"/> <u>Progressive muscle relaxation</u>                                                                                                                                       |                                              |                         |
| <b>PHARMACOLOGIC INTERVENTION NOTES</b>                                                                                                                                                                                                                                                                                                                                                                                                                                                          |                       |                                                                                                                                                   | <b>MEDICATIONS [Drug/Dose/Route/Schedule]</b>                                                                                                                                                       |                                              |                         |
| <input type="checkbox"/> BREAKTHROUGH OR REFRACTORY Nausea/Vomiting                                                                                                                                                                                                                                                                                                                                                                                                                              |                       |                                                                                                                                                   | <b>Phenothiazines</b>                                                                                                                                                                               |                                              |                         |
| <input type="checkbox"/> DELAYED Nausea/Vomiting                                                                                                                                                                                                                                                                                                                                                                                                                                                 |                       |                                                                                                                                                   | <input type="checkbox"/> <u>Prochlorperazine (Compazine)/25mg/PR/Q 12 hrs ATC or pm</u>                                                                                                             |                                              |                         |
| <input type="checkbox"/> Nausea/Vomiting not related to chemo                                                                                                                                                                                                                                                                                                                                                                                                                                    |                       |                                                                                                                                                   | <input checked="" type="checkbox"/> <u>Prochlorperazine/(Compazine)/10 mg/PO/Q 4-6 hrs</u>                                                                                                          |                                              |                         |
|                                                                                                                                                                                                                                                                                                                                                                                                                                                                                                  |                       |                                                                                                                                                   | <input type="checkbox"/> <u>Promethazine/12.5-25 mg/PO/Q 4 hrs pm</u>                                                                                                                               |                                              |                         |
|                                                                                                                                                                                                                                                                                                                                                                                                                                                                                                  |                       |                                                                                                                                                   | <b>5-HT3 receptor agonists (May cause headache, especially if a history of migraines)</b>                                                                                                           |                                              |                         |
|                                                                                                                                                                                                                                                                                                                                                                                                                                                                                                  |                       |                                                                                                                                                   | <input checked="" type="checkbox"/> <u>Odansetron/16mg/PO/QD</u>                                                                                                                                    |                                              |                         |
|                                                                                                                                                                                                                                                                                                                                                                                                                                                                                                  |                       |                                                                                                                                                   | <b>Benzodiazapenes</b>                                                                                                                                                                              |                                              |                         |
|                                                                                                                                                                                                                                                                                                                                                                                                                                                                                                  |                       |                                                                                                                                                   | <input checked="" type="checkbox"/> <u>Lorazepam (Ativan)/0.5 to 2 mg/PO/Q 4-6 hrs</u>                                                                                                              |                                              |                         |
|                                                                                                                                                                                                                                                                                                                                                                                                                                                                                                  |                       |                                                                                                                                                   | <b>Substituted benzamide</b>                                                                                                                                                                        |                                              |                         |
|                                                                                                                                                                                                                                                                                                                                                                                                                                                                                                  |                       |                                                                                                                                                   | <b>Corticosteroids</b>                                                                                                                                                                              |                                              |                         |
|                                                                                                                                                                                                                                                                                                                                                                                                                                                                                                  |                       |                                                                                                                                                   | <b>NK1 receptor agonist</b>                                                                                                                                                                         |                                              |                         |
|                                                                                                                                                                                                                                                                                                                                                                                                                                                                                                  |                       |                                                                                                                                                   | <input type="checkbox"/> <u>Changed Drug Class</u>                                                                                                                                                  |                                              |                         |
|                                                                                                                                                                                                                                                                                                                                                                                                                                                                                                  |                       |                                                                                                                                                   | <input type="checkbox"/> <u>Changed to ATC dosing</u>                                                                                                                                               |                                              |                         |
|                                                                                                                                                                                                                                                                                                                                                                                                                                                                                                  |                       |                                                                                                                                                   | <input type="checkbox"/> <u>Advised to take as directed</u>                                                                                                                                         |                                              |                         |
|                                                                                                                                                                                                                                                                                                                                                                                                                                                                                                  |                       |                                                                                                                                                   | <input type="checkbox"/> <u>Changed to rectal route</u>                                                                                                                                             |                                              |                         |
|                                                                                                                                                                                                                                                                                                                                                                                                                                                                                                  |                       |                                                                                                                                                   | <input type="checkbox"/> <u>Reported breakthrough or delayed nausea/vomiting to team</u>                                                                                                            |                                              |                         |
| Notes                                                                                                                                                                                                                                                                                                                                                                                                                                                                                            |                       |                                                                                                                                                   |                                                                                                                                                                                                     |                                              |                         |

Screenshot C. This screen is used to guide and document actions during the NP call to the patient. The NP adds pertinent information gathered before the call to the free text field. The screen guides additional symptom-specific assessment and evidence-based interventions. This page is user friendly because the NP can point and click while on the phone with the patient. Clicking any underlined item provides greater detail. A link on the top right allows viewing the latest clinical practice guideline.
